# Supplementary material
Source: PubMed Central journal article supplement (PMC2933184)

Figure S1 - LaBarge et al

The CD49f+/CD29hi subset of the D920 cell line are bipotent human mammary progenitors that form TDLU and self-renew.

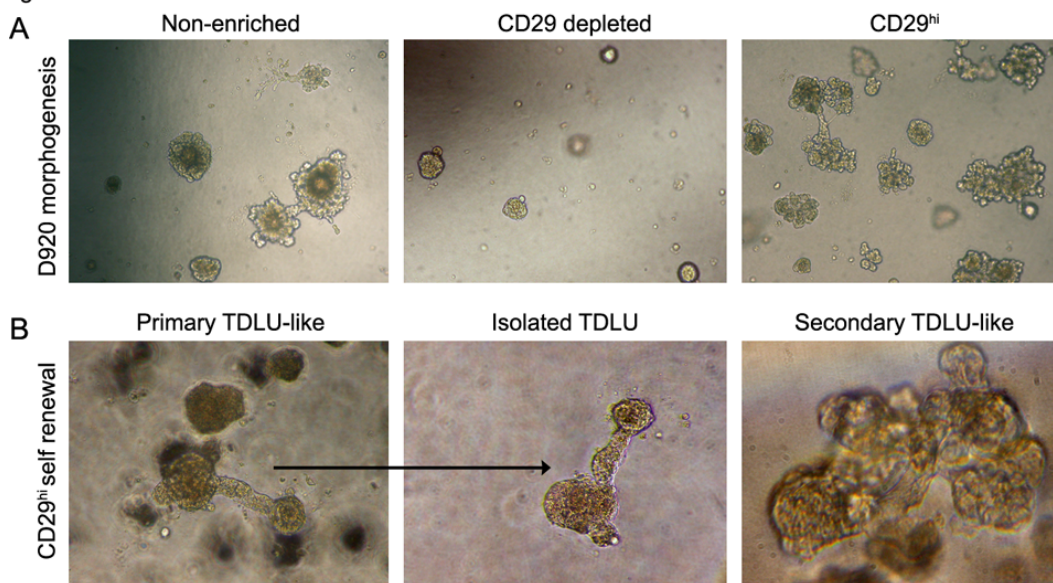

Figure S2 - LaBarge et al

Laminin1, Jagged1, and P-cadherin are important effectors of mammary progenitor cell functions.

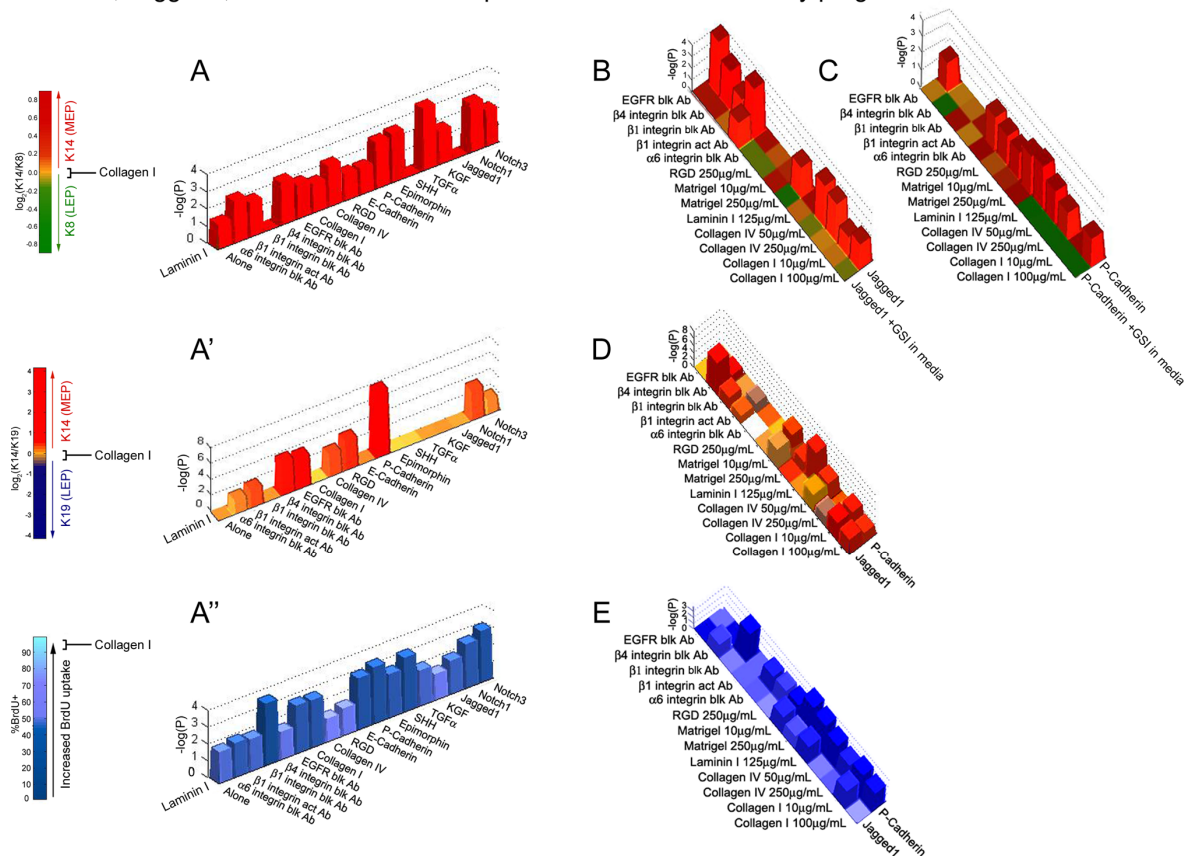

Figure S3 - LaBarge et al

Recombinant Jagged1 and P-cadherin impose cell phenotypes in a dose-dependent manner

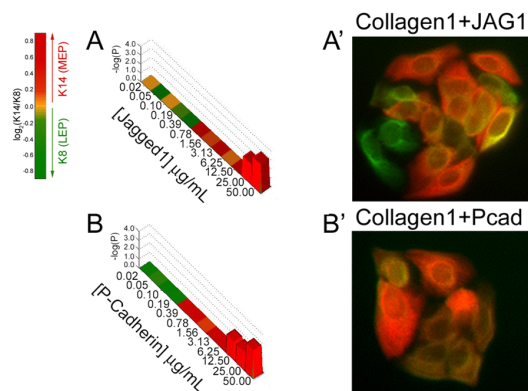

Figure S4 - LaBarge et al

Progenitors, separated from any other cell either exhibit the K14+/K19+ progenitor or K14+/K19- MEP phenotype.

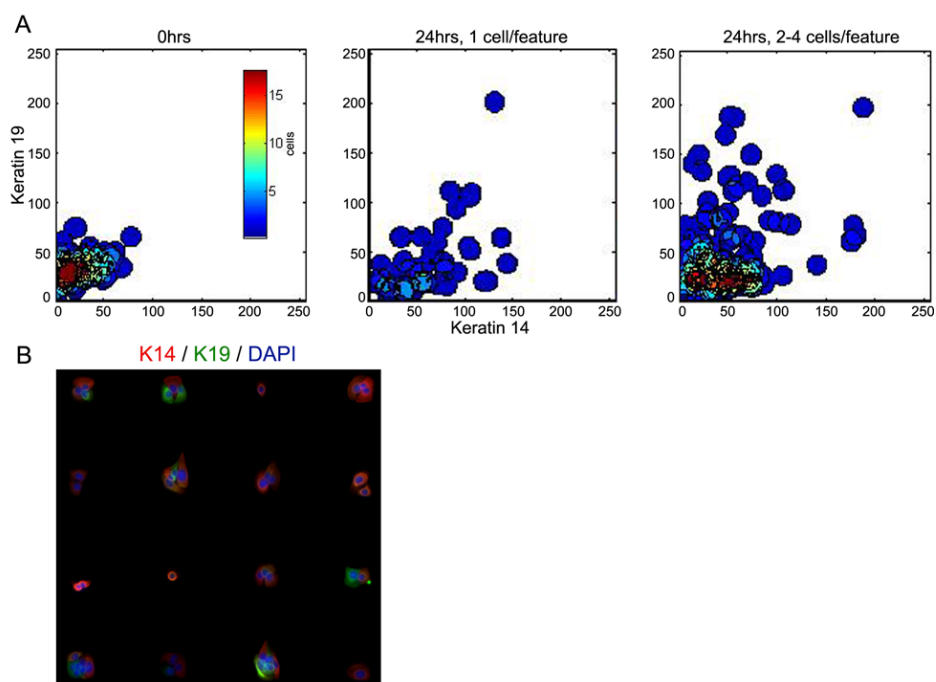

Figure S5 -LaBarge et al

Proteins characteristic of stem cells and MEP are increased upon treatment with Jagged1 or P-cadherin, respectively

**A**

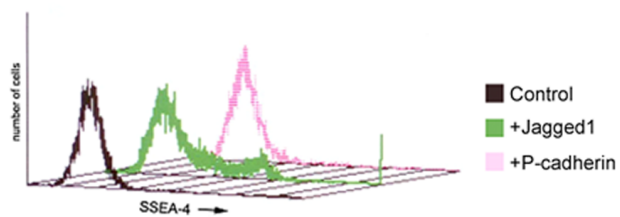

**B**

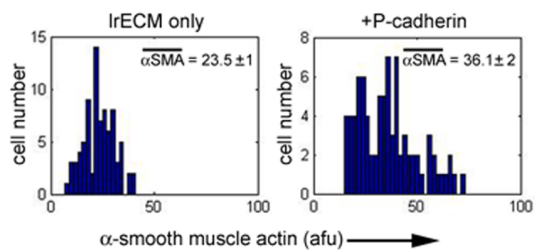

Supplement: NIHMS170188-supplement-Supplementary_Data.pdf [file NIHMS170188-supplement-Supplementary_Data.pdf]
